# Supplementary material for: 3-Hydroxyolean-12-en-27-oic Acids Inhibit RANKL-Induced Osteoclastogenesis in Vitro and Inflammation-Induced Bone Loss in Vivo
Source: PubMed Central journal article supplement (PMC7432734; doi:10.3390/ijms21155240), 2020-07-23
Supplement: ijms-21-05240-s001.pdf [file ijms-21-05240-s001.pdf]

*Supplementary materials*

**Anti-osteoclastogenic activities of 3-hydroxyolean-12-en-27-oic acid derivatives *in vitro* and *in vivo***

Wonyoung Seo <sup>1,2,†</sup>, Suhyun Lee <sup>1,2,†</sup>, Phuong Thao Tran <sup>1,2</sup>, Thi Quynh-Mai Ngo <sup>3</sup>, Okwha Kim <sup>1,2</sup>, Thanh Huong Le <sup>4</sup>, Nguyen Hai Dang <sup>4</sup>, Cheol Hwangbo <sup>5</sup>, Byung Sun Min <sup>3</sup> and Jeong-Hyung Lee<sup>1,2,\*</sup>

**Figure S1**

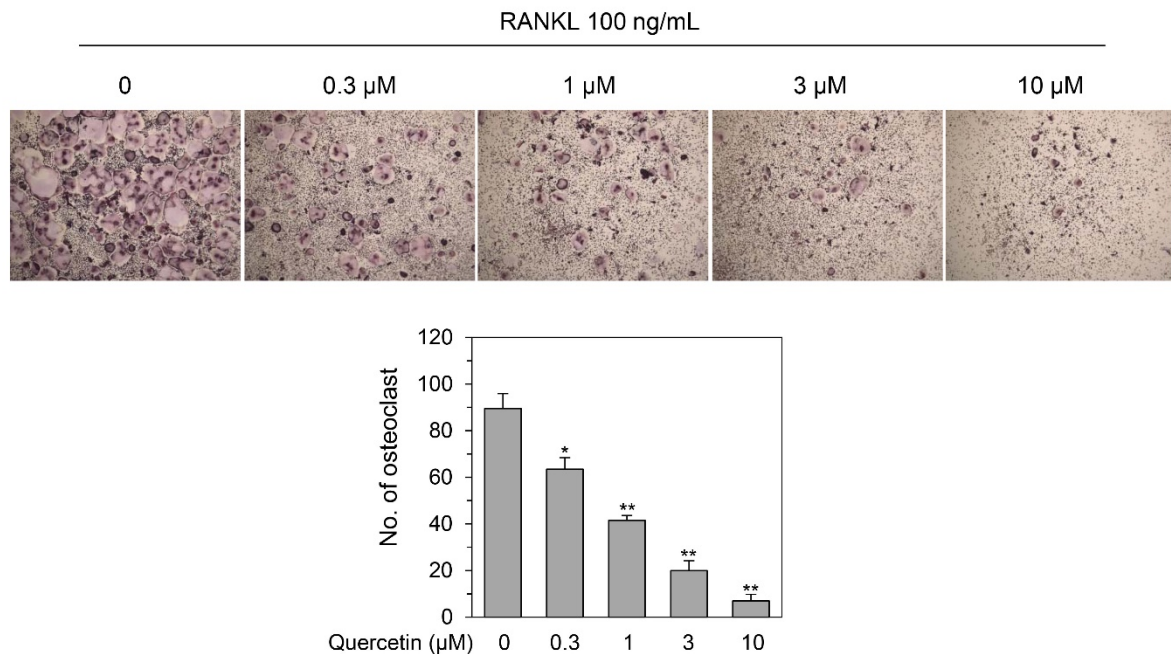

**Figure S1. Effect of quercetin on RANKL-induced osteoclast formation.** BMMs were treated with the indicated concentrations of quercetin, and then stimulated with M-CSF (30 ng/mL) and RANKL (100 ng/mL) for 7 days. Cells were fixed and stained for TRAP. The number of TRAP-positive osteoclasts (>5 nuclei) was determined following image capture (magnification, 40×). Data are presented as the mean ± SE (\*\* $P < 0.01$ , versus vehicle-treated control;  $n=3$ ).
